# Supplementary material for: Influence of phase transformation pathways on electrochemical properties by using thermally derived solid-solution LiFePO4nanoparticles
Source: Royal Society of Chemistry journal article supplement (doi:10.1039/c5ta01809a), 2015-01-01
Supplement: c5ta01809a1.pdf [file c5ta01809a1.pdf]

## Supporting information

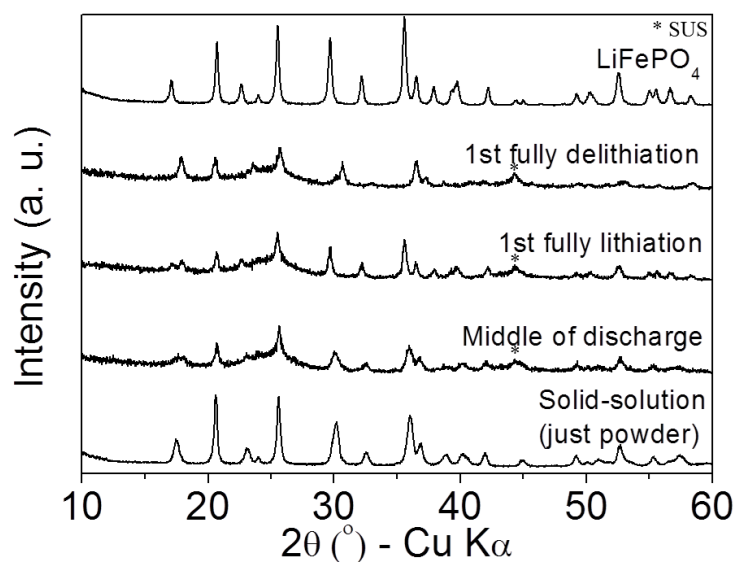

**S.1** XRD patterns of bare  $\text{LiFePO}_4$  nanoparticle. And XRD patterns of SS nanoparticle and its fully delithiated and lithiated and state of discharge 50% electrode.
